# Supplementary material for: The Effect of Endometrial Thickness on Pregnancy, Maternal, and Perinatal Outcomes of Women in Fresh Cycles After IVF/ICSI: A Systematic Review and Meta-Analysis
Source: PubMed Central journal article supplement (PMC8874279; doi:10.3389/fendo.2021.814648), 2022-02-11

**Supplementary Table 1** Search strategy for databases

| Database         | Search strategy                                                                                                                                                                                                                                                                                                                                                                                                                                                                                                                                                                                                                                                                                                                                                         | No. of references |
|------------------|-------------------------------------------------------------------------------------------------------------------------------------------------------------------------------------------------------------------------------------------------------------------------------------------------------------------------------------------------------------------------------------------------------------------------------------------------------------------------------------------------------------------------------------------------------------------------------------------------------------------------------------------------------------------------------------------------------------------------------------------------------------------------|-------------------|
| Pubmed           | ((in vitro fertilization) OR (intracytoplasmic sperm injection) OR (artificial reproductive technology)) AND ((endometrial thickness) OR (endometrial sonographic parameters) OR (endometrial characters) OR (endometrial receptive)) AND ((live birth rate) OR (pregnancy outcomes) OR (neonatal outcomes) OR (maternal outcomes) OR (obstetric outcomes) OR (treatment outcomes))                                                                                                                                                                                                                                                                                                                                                                                     | 538               |
| Cochrane library | ((in vitro fertilization) OR (intracytoplasmic sperm injection) OR (artificial reproductive technology)) AND ((endometrial thickness) OR (endometrial sonographic parameters) OR (endometrial characters) OR (endometrial receptive)) AND ((live birth rate) OR (pregnancy outcomes) OR (neonatal outcomes) OR (maternal outcomes) OR (obstetric outcomes) OR (treatment outcomes)) in Title Abstract Keyword - (Word variations have been searched)                                                                                                                                                                                                                                                                                                                    | 293               |
| Embase           | (in AND vitro AND ('fertilization'/exp OR fertilization) OR (intracytoplasmic AND ('sperm'/exp OR sperm) AND ('injection'/exp OR injection)) OR (artificial AND reproductive AND ('technology'/exp OR technology))) AND (endometrial AND ('thickness'/exp OR thickness) OR (endometrial AND sonographic AND ('parameters'/exp OR parameters)) OR (endometrial AND characters) OR (endometrial AND receptive)) AND (live AND ('birth'/exp OR birth) AND rate OR (('pregnancy'/exp OR pregnancy) AND ('outcomes'/exp OR outcomes)) OR (neonatal AND ('outcomes'/exp OR outcomes)) OR (('maternal'/exp OR maternal) AND ('outcomes'/exp OR outcomes)) OR (obstetric AND ('outcomes'/exp OR outcomes)) OR (('treatment'/exp OR treatment) AND ('outcomes'/exp OR outcomes)) | 685               |
| Web of science   | ((in vitro fertilization) OR (intracytoplasmic sperm injection) OR (artificial reproductive technology)) AND ((endometrial thickness) OR (endometrial sonographic parameters) OR (endometrial characters) OR (endometrial receptive)) AND ((live birth rate) OR (pregnancy outcomes) OR (neonatal outcomes) OR (maternal outcomes) OR (obstetric outcomes) OR (treatment outcomes))                                                                                                                                                                                                                                                                                                                                                                                     | 836               |
| Total            | /                                                                                                                                                                                                                                                                                                                                                                                                                                                                                                                                                                                                                                                                                                                                                                       | 2351              |

**Supplementary Table 2** Quality assessment of included studies based on Newcastle-Ottawa Scale.

| Study          | Selection                                |                                     |                               | Comparability | Outcome                                                                    |                                                                 |                       | Score |                                                 |
|----------------|------------------------------------------|-------------------------------------|-------------------------------|---------------|----------------------------------------------------------------------------|-----------------------------------------------------------------|-----------------------|-------|-------------------------------------------------|
|                | Representativeness of the exposed cohort | Selection of the non-exposed cohort | Ascertainment of the exposure |               | Demonstration that outcomes of interest were not present at start of study | Comparability of cohorts on the basis of the design or analysis | Assessment of outcome |       | Was follow-up long enough for outcomes to occur |
| Shakerian 2021 | *                                        | *                                   | *                             |               | *                                                                          | *                                                               | *                     | *     | 7                                               |
| Simeonov 2020  | *                                        | *                                   | *                             |               | *                                                                          | *                                                               | *                     | *     | 7                                               |
| Guo 2020       | *                                        | *                                   | *                             |               | **                                                                         | *                                                               | *                     | *     | 8                                               |
| Lv 2020        | *                                        | *                                   | *                             |               | *                                                                          | *                                                               | *                     | *     | 7                                               |
| Tomic 2020     |                                          | *                                   | *                             |               | *                                                                          | *                                                               | *                     | *     | 6                                               |
| Nishihara 2020 |                                          | *                                   | *                             |               | *                                                                          | *                                                               | *                     | *     | 5                                               |
| Eftekhari 2019 | *                                        | *                                   | *                             |               |                                                                            | *                                                               | *                     | *     | 6                                               |
| Ovayolu 2019   |                                          | *                                   | *                             |               | *                                                                          | *                                                               | *                     | *     | 6                                               |
| Song 2019      |                                          | *                                   | *                             |               | *                                                                          | *                                                               | *                     | *     | 6                                               |
| Chan 2018      | *                                        | *                                   | *                             |               | *                                                                          | *                                                               | *                     | *     | 7                                               |
| Holden 2018    | *                                        | *                                   | *                             |               | *                                                                          | *                                                               | *                     | *     | 7                                               |
| Oron 2018      | *                                        | *                                   | *                             |               | *                                                                          | *                                                               | *                     | *     | 8                                               |
| Ribeiro 2018   |                                          | *                                   | *                             |               | **                                                                         | *                                                               | *                     | *     | 7                                               |
| Wu 2014        |                                          | *                                   | *                             |               | **                                                                         | *                                                               | *                     | *     | 7                                               |
| Zhao 2014      | *                                        | *                                   | *                             |               | *                                                                          | *                                                               | *                     | *     | 7                                               |
| Aydin 2013     |                                          | *                                   | *                             | *             | **                                                                         | *                                                               |                       |       | 6                                               |
| Zhao 2012      | *                                        | *                                   | *                             |               |                                                                            | *                                                               | *                     | *     | 6                                               |



**Supplementary Fig. 1** Funnel plot of studies related to the effect of thin endometrium on CPR.

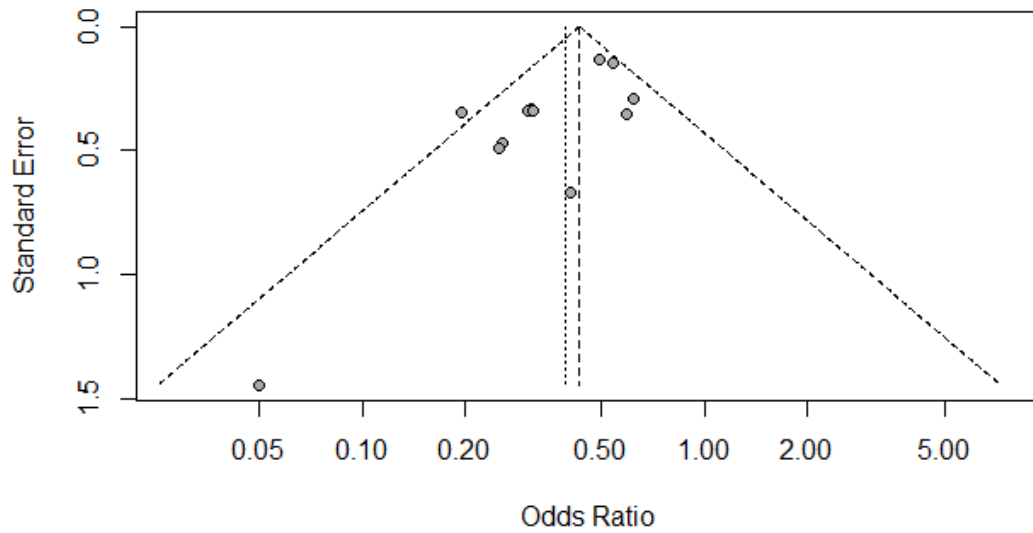

**Supplementary Fig. 2** Funnel plot of studies related to the effect of thick endometrium on CPR.

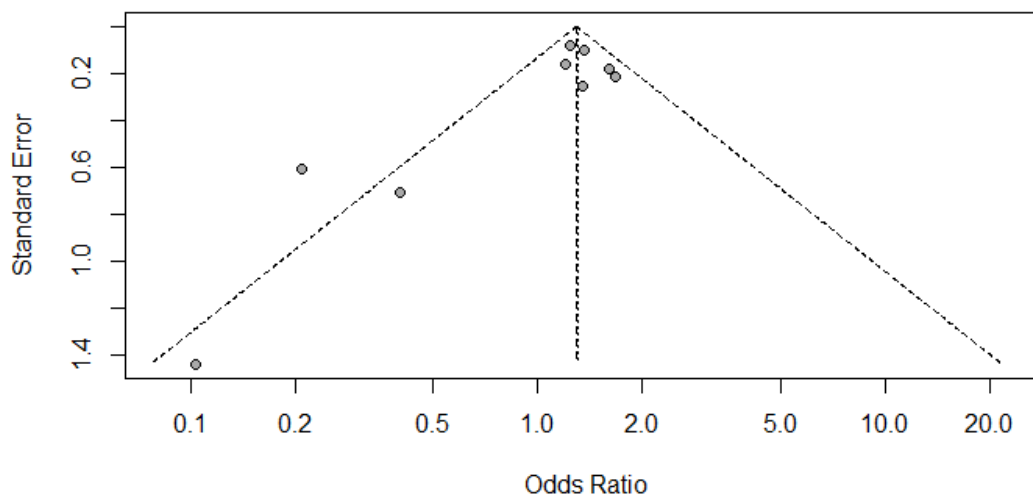

Supplement: DataSheet_1.pdf [file DataSheet_1.pdf]
